# Supplementary material
Source: PubMed Central journal article supplement (PMC4914433)

## Legends

**Figure 1.** The Occurrence of any Restricting Symptoms (Panel A) and Mean Number of Restricting Symptoms (Panel B) in the 12 Months before and 3 Months after Hospice Admission. Values for the prevalence of symptoms were calculated by dividing the number of participants who reported any restricting symptoms that month by the total number of participants who completed interviews in the month. Error bars in Panel A represent the asymptotic standard error. Errors in Panel B represent the standard error. The dashed vertical line denotes the time of hospice admission. Months before hospice admission are denoted by negative values, while those afterwards are denoted by positive values. The number of participants varies prior to hospice admission because of missing values and decreases after hospice admission because of deaths.

**Figure 2.** The Occurrence of Specific Restricting Symptoms in the 12 Months before and 3 Months after Hospice Admission. Symptoms were categorized a priori according to how amenable they might be to hospice treatment. Panel A: most; Panel B: intermediate; Panel C: least. Values for the prevalence of symptoms were calculated by dividing the number of participants that reported the particular restricting symptom that month by the total number of participants who completed interviews in the month. Dashed vertical lines denote the time of hospice admission. Months before hospice admission are denoted by negative values, while those afterwards are denoted by positive values. The number of participants varies prior to hospice admission because of missing values and decreases after hospice admission because of deaths.

**Figure 3.** The Occurrence of any Restricting Symptoms (Panels A and B) and Mean Number of Restricting Symptoms (Panels C and D) in the 12 Months before and 3 Months after Hospice Admission by Hospice Admission Diagnosis and Sex. Values for the prevalence of symptoms were calculated by dividing the number of participants that reported the particular restricting symptom that month by the total number of participants who completed interviews in the month. Dashed vertical line denote the time of hospice admission. Months before hospice admission are denoted by negative values, while those afterwards are denoted by positive values. The number of participants varies prior to hospice admission because of missing values and decreases after hospice admission because of deaths. At 3 months, none of the 5 survivors with organ failure had any restricting symptoms.

**eFigure 1.** The Occurrence of Specific Restricting Symptoms in the 12 Months before and 3 Months after Hospice Admission Among Participants with at Least one Post-hospice Interview. Symptoms were categorized a priori according to how amenable they might be to hospice treatment. Panel A: most; Panel B: intermediate; Panel C: least. Values for the prevalence of symptoms were calculated by dividing the number of participants that reported the particular restricting symptom that month according to the total number of participants who provided interviews in the month. Dashed vertical lines denote the time of hospice admission. Months before hospice admission are denoted by negative values, while those afterwards are denoted by positive values. The number of participants varies prior to hospice admission because of missing values and decreases after hospice admission because of deaths.

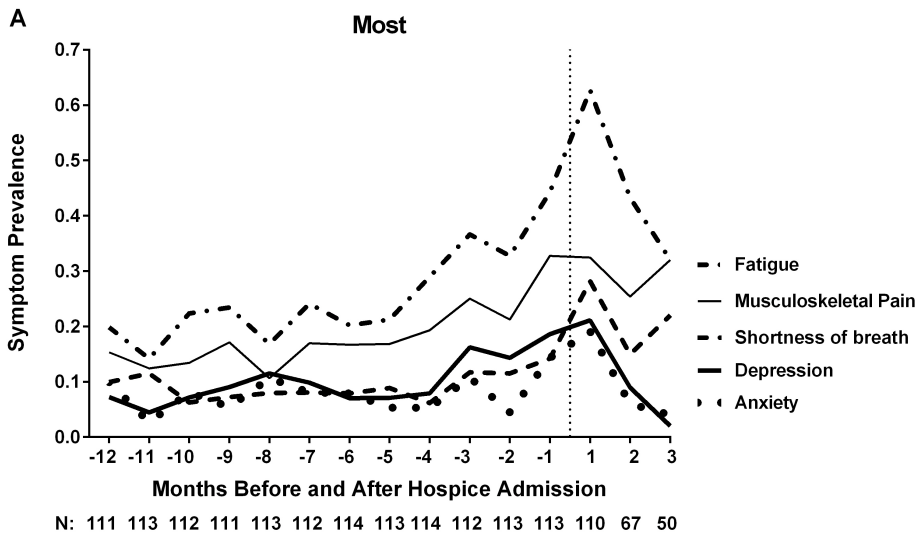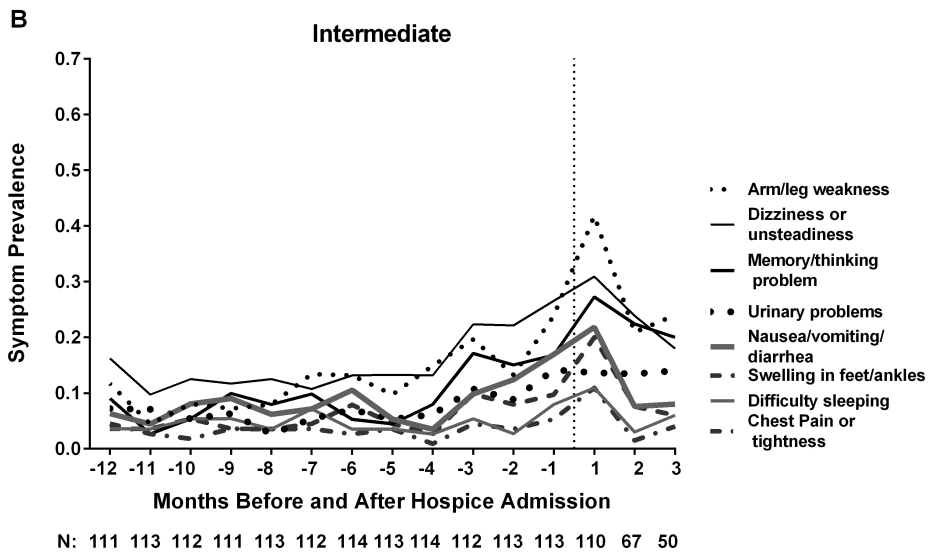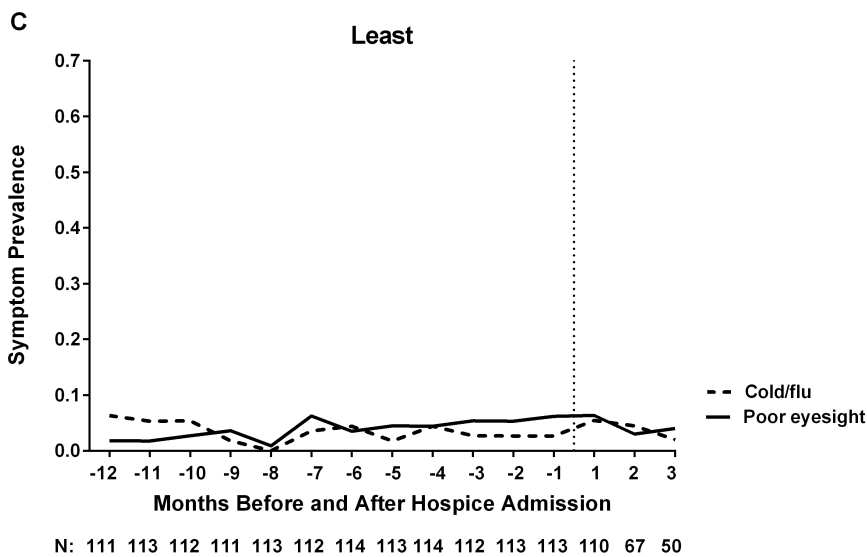

Supplement: NIHMS767160-supplement-supplement_1.pdf [file NIHMS767160-supplement-supplement_1.pdf]
